# Supplementary material
Source: publisher figshare collection journal article supplement (https://acs.figshare.com/ndownloader/files/3780877)
Supplement: Supplementary file 1 [file 3780877]

analog number	SMILES	mTOR Kinase IC50(µM)	pS6 IC50 (µM)	p-p70S6K IC50 (µM)	pAkt(S473) IC50 (µM)	Prolif. IC50 (µM)	PI3K? IC50(µM)	DNA PK IC50(µM)	Rat S9 (% rem. 60 min)	Human S9 (% rem. 60 min)	Caco2 Papp A-B (x 10-6 cm/s)	Papp B-A (x 10-6 cm/s)	B-A/A-B (Efflux ratio)	Rat IV 2 mg/kg CL (mL/min/kg)	Rat IV 2 mg/kg MRT (h)	Rat PO 10 mg/kg Cmax (µM)	Rat PO 10 mg/kg AUC(0-inf) (µM-hr)	Rat PO 10 mg/kg F(%)
3	c1(c2ncn[nH]2)ccc(c3nc(N(CCC4CCOCC4)CC(=O)N5)c5nc3)cc1				0.034											BLQ	BLQ
9	c1(c2cnc(c3[nH]cnn3)cc2)nc(N(CCC4CCOCC4)CC(=O)N5)c5nc1				0.024											0.02 ± 0.01	0.18 ± 0.07
10	c1(c(ccc2c3[nH]cnn3)c(C)n2)nc(N(CCC4CCOCC4)CC(=O)N5)c5nc1	0.090 ± 0.015	0.108 ± 0.017		0.106 ± 0.0003	0.573 ± 0.273			80 ± 2	90 ± 5	8	21.8	2.7	NT	NT	0.09 ± 0.05	0.64 ± 0.48	NC
11	c1(c(ccc2c3[nH]cnn3)c(C)n2)nc(N(CCC4CCOCC4)C(=O)CN5)c5nc1	0.014 ± 0.002		0.008 ± 0.003	0.006 ± 0.001	0.034 ± 0.006			76 ± 6	100	4.2	54.7	12.9	37.9 ± 5.5	0.69 ± 0.08	0.59 ± 0.11	1.47 ± 0.23	28 ± 6
12	c1(c2c(C)nc(c3[nH]cnn3)cc2)nc(N(CCN4CCOCC4)C(=O)CN5)c5nc1	0.037 ± 0.005		0.054 (n=1)	0.112 (n=1)	0.413 (n=1)			96 ± 14	86 ± 3	NT	NT	NT
13	c1(c2c(C)nc(c3[nH]cnn3)cc2)nc(N(CC4CCOCC4)C(=O)CN5)c5nc1	0.012 ± 0.000	0.015 ± 0.004		0.004 ± 0.002	0.082 ± 0.014			100	100	9.7	14.5	1.5	NT	NT	0.23 ± 0.07	2.65 ± 0.94	NC
14	c1(c2c(C)nc(c3nc[nH]n3)cc2)nc(N(C[C@H]4CC[C@@H](OC)CC4)C(=O)CN5)c5nc1	0.003 ± 0.002		0.004 (n=1)	0.009 (n=1)	0.024 (n=1)			39 ± 2	10 ± 6	NT	NT	NT
15	c1(c2c(C)nc(c3nc[nH]n3)cc2)nc(N(C[C@H]4CC[C@H](OC)CC4)C(=O)CN5)c5nc1	0.031 ± 0.014		0.027 ± 0.013	0.098 ± 0.006	0.142 ± 0.053			100	90 ± 1	NT	NT	NT
16	c1(c2c(C)nc(c3nnc[nH]3)cc2)nc(N([C@H]4CC[C@@H](OC)CC4)CC(=O)N5)c5nc1	0.051 ± 0.013	0.085 (n=1)		0.131 ± 0.086	0.423 ± 0.280			90 ± 3	36 ± 3	NT	NT	NT
17	c1(c(ccc2c3[nH]cnn3)c(C)n2)nc(N([C@H]4CC[C@H](OC)CC4)CC(=O)N5)c5nc1	0.041 ± 0.002	0.203 (n=1)		0.120 ± 0.027	0.478 ± 0.184			89 ± 4	87 ± 4	14.8	20.2	1.4	NT	NT	0.53 ± 0.17	4.03 ± 0.83	NC
18	c1(c2ccc(c3[nH]cnn3)nc2C)nc(N([C@H]4CC[C@H](OC)CC4)C(=O)CN5)c5nc1	0.015 ± 0.001	0.020 ± 0.011		0.013 ± 0.004	0.038 ± 0.010			72 ± 2	82 ± 13	9.7	59.5	6.2	16.0 ± 7.5	6.5 ± 4.6	0.84 ± 0.27	6.96 ± 1.17	49 ± 21
19	c1(c2c(C)nc(c3[nH]cnn3)cc2)nc(N([C@H]4CC[C@@H](O)CC4)C(=O)CN5)c5nc1	0.008 ± 0.003		0.006 ± 0.002	0.006 ± 0.001	0.037 (n=1)			100	100	1.6	29.2	18.1	NT	NT	0.03 ± 0.01	0.07 ± 0.01	NC
20	c1(c2c(C)nc(c3[nH]cnn3)cc2)nc(N([C@H]4CC[C@H](O)CC4)C(=O)CN5)c5nc1	0.019 ± 0.004		0.012 (n=1)	0.027 (n=1)	0.119 (n=1)			91 ± 5	97 ± 5	NT	NT	NT
21	c1(c2c(C)nc(c3[nH]cnn3)cc2)nc(N(C4CCOCC4)C(=O)CN5)c5nc1	0.026 ± 0.005		0.010 (n=1)	0.035 (n=1)	0.102 (n=1)
22	c1(c2c(C)nc(c3[nH]cnn3)cc2)nc(N(C(C)C)C(=O)CN4)c4nc1	0.030 ± 0.004	0.044 ± 0.008		0.049 ± 0.009	0.149 ± 0.014			100	99 ± 6	37.6	45.2	1.2	6.97 ± 0.45	3.9 ± 0.2	2.08 ± 0.47	22.02 ± 9.48	64 ± 24
23	c1(c2c(C)nc(c3[nH]cnn3)cc2)nc(N(CCOC)CC(=O)N4)c4nc1	0.068 ± 0.013		0.066 ± 0.014	0.230 ± 0.032	0.363 ± 0.029			97 ± 2	100	16. 2	19.1	1.2	16.9 ± 1.3	1.8 ± 0.3	2.43 ± 0.57	18.91 ± 3.56	~100
24	c1(c2c(C)nc(c3[nH]cnn3)cc2)nc(N(CCOC)C(=O)CN4)c4nc1	0.019 ± 0.002		0.010 ± 0.004	0.017 ± 0.002	0.137 ± 0.025			91 ± 9	100	5	38.8	7.7	34.7 ± 4.8	2.2 ± 0.2	1.96 ± 0.42	14.03 ± 1.99	~100
25	c1(c2c(C)nc(c3[nH]cnn3)cc2)nc(N(CC)CC(=O)N4)c4nc1	0.090 ± 0.016		0.053 ± 0.033	0.369 ± 0.007	0.889 ± 0.008			89 ± 7	100	NT	NT	NT	23.8 ± 4.2	1.2 ± 0.3	0.55 ± 0.05	5.27 ± 2.33	50 ± 24
26	c1(c2c(C)nc(c3[nH]cnn3)cc2)nc(N(CC)C(=O)CN4)c4nc1	0.021 ± 0.002	0.023 ± 0.007		0.022 ± 0.003	0.138 ± 0.019	0.852 ± 0.151	0.013 ± 0.001	100	100	30.4	38.1	1.3	7.35 ± 2.13	4.3 ± 0.4	1.67 ± 0.42	27.46 ± 1.44	78 ± 20
